# Supplementary material for: Gd doped molybdenum selenide/carbon nanofibers: an excellent electrocatalyst for monitoring endogenous H2S
Source: Royal Society of Chemistry journal article supplement (doi:10.1039/d1qi00045d), 2021-01-01
Supplement: d1qi00045d1.pdf [file d1qi00045d1.pdf]

## Supporting Information

### **Gd doped molybdenum selenide/carbon nanofiber: an excellent electrocatalyst for monitoring endogenous H<sub>2</sub>S**

*Nithiya Jeromiyas,<sup>a</sup> Chun-Mao Lin,<sup>b</sup> Yu-Chieh Lee,<sup>c</sup> Ching-Hui Chen<sup>c</sup>, Veerappan Mani,<sup>a</sup> Rameshkumar Arumugam,<sup>d,\*</sup> Sheng-Tung Huang<sup>a,\*</sup>*

<sup>a</sup>Institute of Biochemical and Biomedical Engineering, Department of Chemical Engineering and Biotechnology, National Taipei University of Technology, No.1, Section 3, Chung-Hsiao East Road, Taipei 106, Taiwan

<sup>b</sup>Department of Biochemistry, School of Medicine, College of Medicine, Taipei Medical University, Taipei 11031, Taiwan

<sup>c</sup>Department of Obstetrics and Gynecology, Taipei Medical University Hospital, Taipei ,11031, Taiwan

<sup>d</sup>Department of Chemistry, Bannari Amman Institute of Technology, Sathyamangalam, Erode, India

\*Corresponding authors: S.T. Huang [ws75624@ntut.edu.tw](mailto:ws75624@ntut.edu.tw) ; R. Arumugam

[rameshkumar3452@gmail.com](mailto:rameshkumar3452@gmail.com)

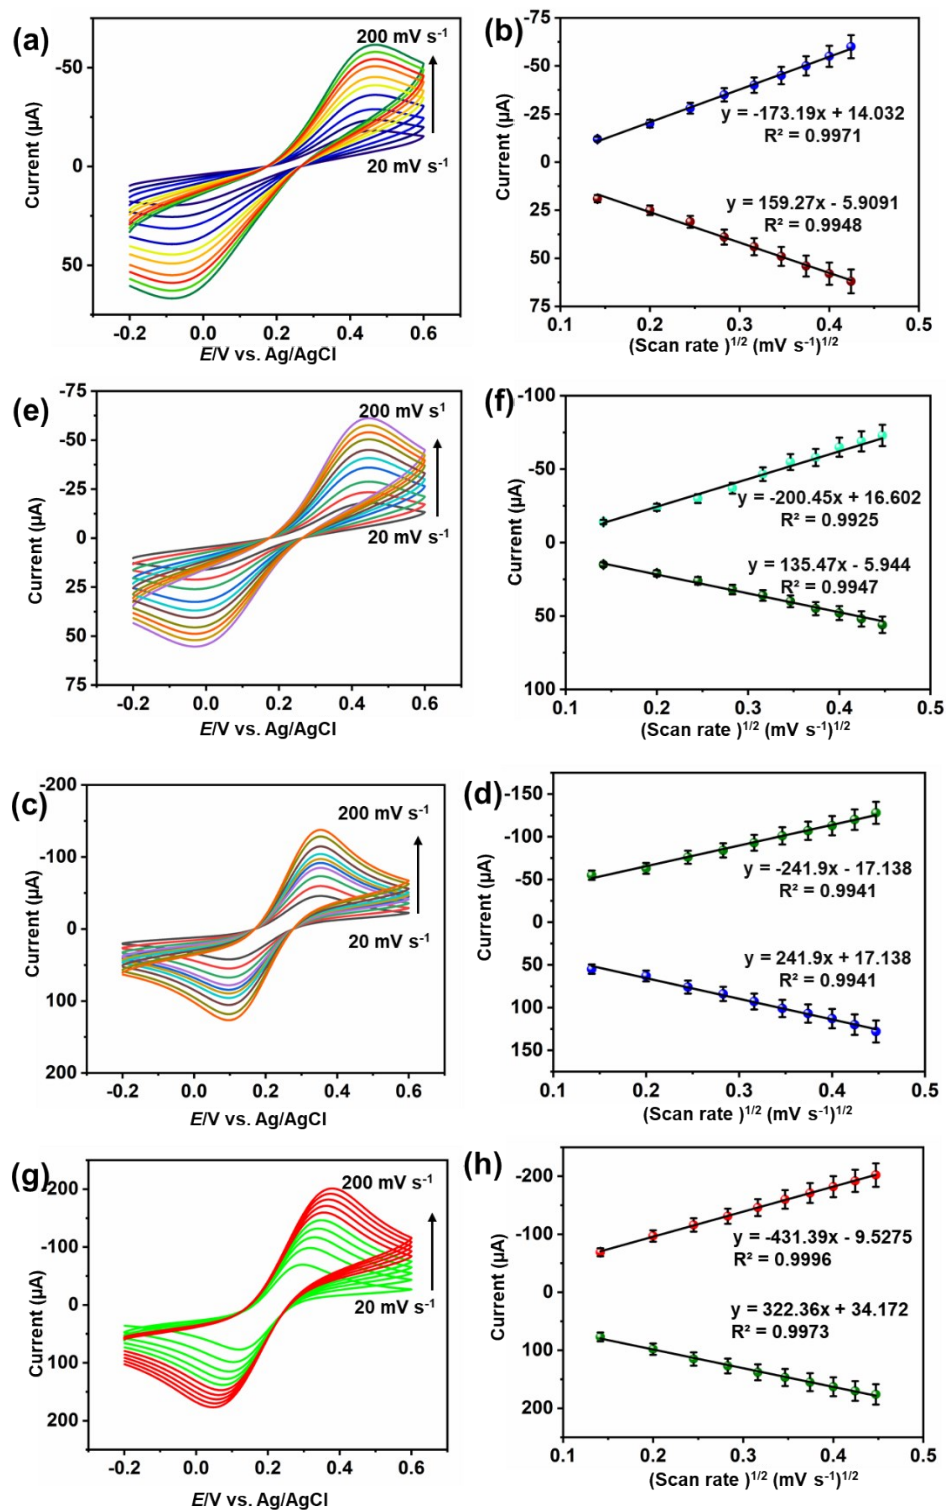

**Figure. S1.** CVs of unmodified GCE (a), CNF/GCE (c), Gd-MoSe<sub>2</sub>/GCE (e) and Gd-MoSe<sub>2</sub>/CNF/GCE (g) in 0.1 M KCl containing 5 mM [Fe(CN)<sub>6</sub>]<sup>3-</sup> at different scan rates varying from 20-200 mV/s. Figures (b), (d), (f), (h) displays the plots between current and square

root of scan rates for the unmodified GCE, CNF/GCE, Gd-MoSe<sub>2</sub>/GCE and Gd-MoSe<sub>2</sub>/CNF/GCE, respectively.

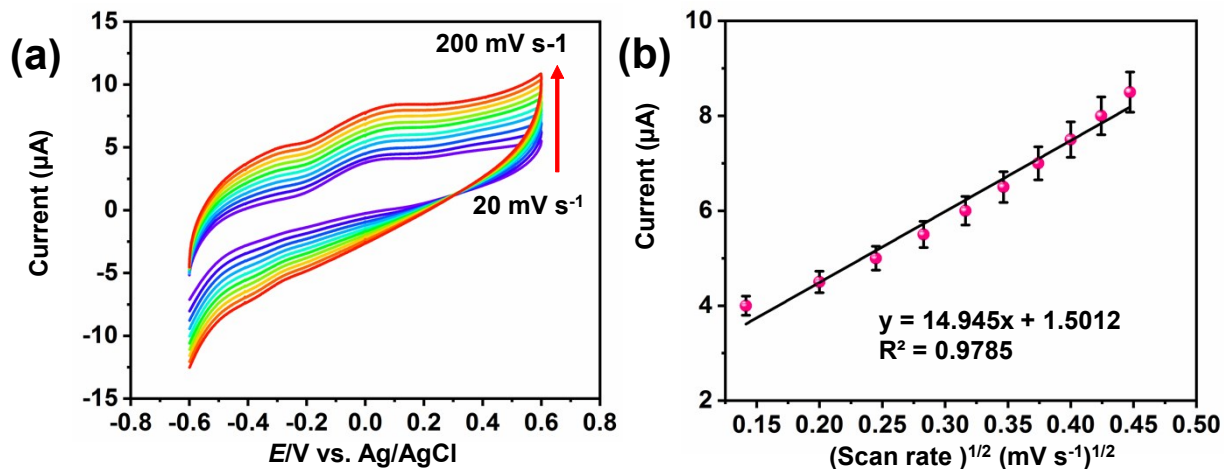

**Figure.S2.**(a) CVs of 125  $\mu\text{M}$   $\text{H}_2\text{S}$  at Gd-MoSe<sub>2</sub>/GCE with different scan rates (20–200  $\text{mV s}^{-1}$ ) in 0.05 M PB (pH 7.0).(b) The plot of peak current vs. square root of the scan rate

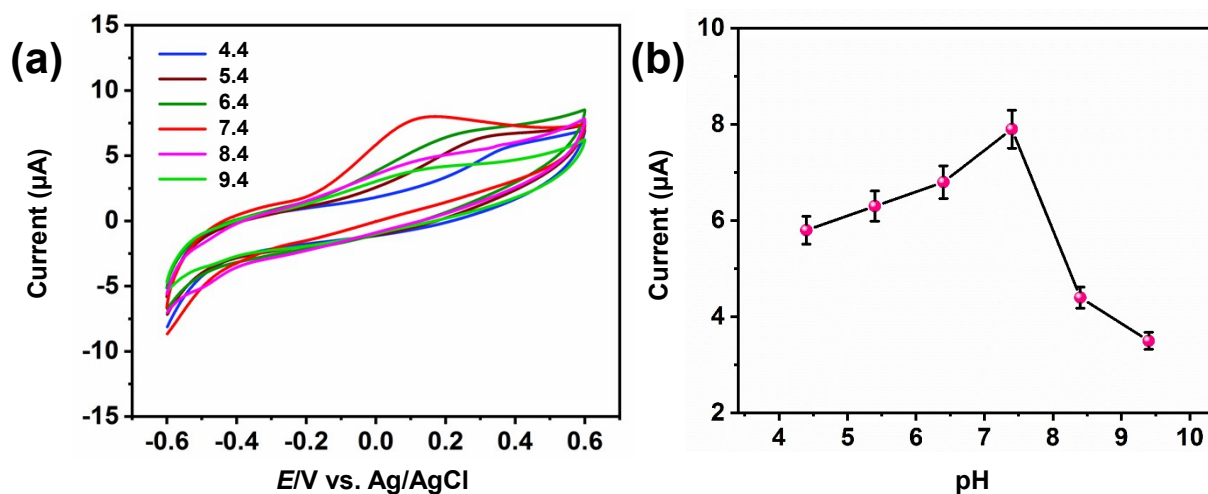

**Figure.S3.** (a)CVs response of Gd-MoSe<sub>2</sub>/CNF/GCE in various pHs ranging from PBS 4.4 to 9.4 in the presence of 125  $\mu\text{M}$   $\text{H}_2\text{S}$  at a scan rate of 50  $\text{mVs}^{-1}$ . (b) The plot of peak current vs. pH.

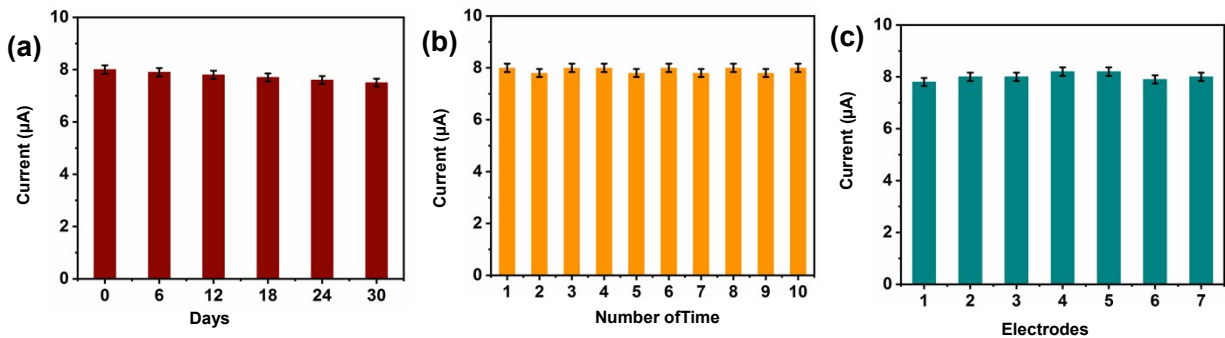

**Figure S4.** (a) Response current of Gd-MoSe<sub>2</sub>/CNF/GCE toward 125 µM H<sub>2</sub>S for 1 month (n = 3). (b) Response current of ten repetitive CVs of the same Gd-MoSe<sub>2</sub>/CNF/GCE in 0.1 M PBS (pH 7.4) with 125 µM H<sub>2</sub>S (n=3). (c) Response current of seven different Gd-MoSe<sub>2</sub>/CNF/GCE prepared with identical protocols in 0.1 M PBS (pH 7.4) with 1 mM 125 µM H<sub>2</sub>S (n = 3).
